# Supplementary material for: A Comprehensive Review of the Integration of Machine Learning into Blockchain Technology
Source: Preprints.org preprint supplement (doi:10.20944/preprints202411.0146.v1), 2024-11-06
Supplement: Supplementary file 1 [file supplementary]

Author Contribution Statement

- **Conceptualization, Methodology, Formal Analysis, Writing - Original Draft**:
  **MD.SULTANUL AREFIN AFNAN** was responsible for developing the research concept, designing and implementing the methodology, conducting data analysis, and drafting the original manuscript.
- **Supervision**:
  **FANG YUAN** and **WANG JINPENG** provided oversight, supervised the research direction, and guided the execution of the study to ensure adherence to academic standards.
- **Writing - Review & Editing**:
  **CHAIMAE YZEM** reviewed and edited the manuscript, refining its content to ensure clarity, coherence, and quality across all sections.
- **Project Administration**:
  **FANG YUAN** and **WANG JINPENG** handled administrative tasks, ensuring the smooth progression of the project from its initiation to completion.
